# Supplementary material
Source: publisher figshare collection journal article supplement (https://plos.figshare.com/ndownloader/files/22596728)
Supplement: Supplementary file [file 22596728]

| <b>Variable</b>                          | <b>Cohort (n=59)</b> | <b>Independent cohort (n =60)</b> | <b><i>p</i></b> |
|------------------------------------------|----------------------|-----------------------------------|-----------------|
| Gestational duration (weeks+days)        | 39+1 (36+3 – 40+3)   | 39+1 (36+4 – 40+1)                | 0.669           |
| Maternal age at sampling (years)         | 37 (35 – 38)         | 36 (33 – 39)                      | 0.268           |
| Nulliparous                              | 18 (30.5%)           | 24 (40.0%)                        | 0.279           |
| IVF                                      | 5 (8.5%)             | 3 (5.0%)                          | 0.491           |
| Maternal BMI at first prenatal visit     | 24.4 (21.2 – 26.8)   | 24.1 (21.7 – 27.1)                | 0.793           |
| Smoking at first prenatal visit          | 3 (5.1%)             | 7 (11.7%)                         | 0.322           |
| Previous preterm delivery                | 4 (6.8%)             | 7 (11.7%)                         | 0.529           |
| Gestational age at sampling (weeks+days) | 15+5 (15+2 – 16+1)   | 15+5 (15+1 – 16+1)                | 0.786           |
| Mode of delivery                         |                      |                                   |                 |
| Vaginal delivery                         | 47 (79.7%)           | 39 (65.0%)                        | 0.074           |
| Vacuum extraction                        | 3 (5.1%)             | 5 (8.3%)                          | 0.717           |
| Cesarean section                         | 9 (15.2%)            | 16 (26.7%)                        | 0.127           |
| Birth weight (grams)                     | 3245 (2820 – 3600)   | 3305 (2964 – 3669)                | 0.546           |
| Neonatal sex                             |                      |                                   | 0.644           |
| Male                                     | 27 (45.8%)           | 30 (50.0%)                        |                 |
| Female                                   | 32 (54.2%)           | 30 (50.0%)                        |                 |
| Apgar score < 7 at 5 min                 | 2 (3.4%)             | 1 (1.7%)                          | 0.619           |
